# Supplementary material for: Development of a novel non-radioactive cell-based method for the screening of SGLT1 and SGLT2 inhibitors using 1-NBDG
Source: Royal Society of Chemistry journal article supplement (doi:10.1039/c3mb70060g), 2013-04-19
Supplement: c3mb70060g.pdf [file c3mb70060g.pdf]

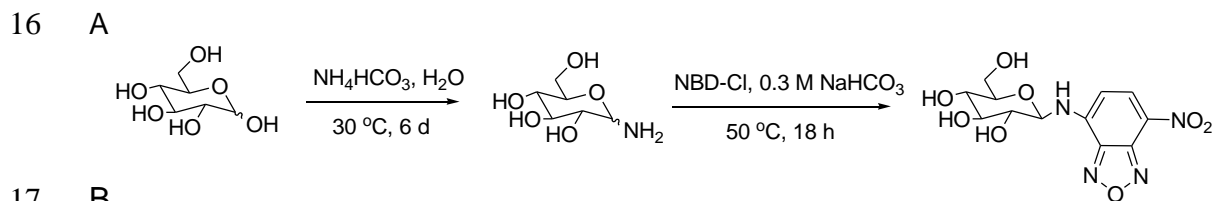

18 <sup>1</sup>H-NMR Spectrum

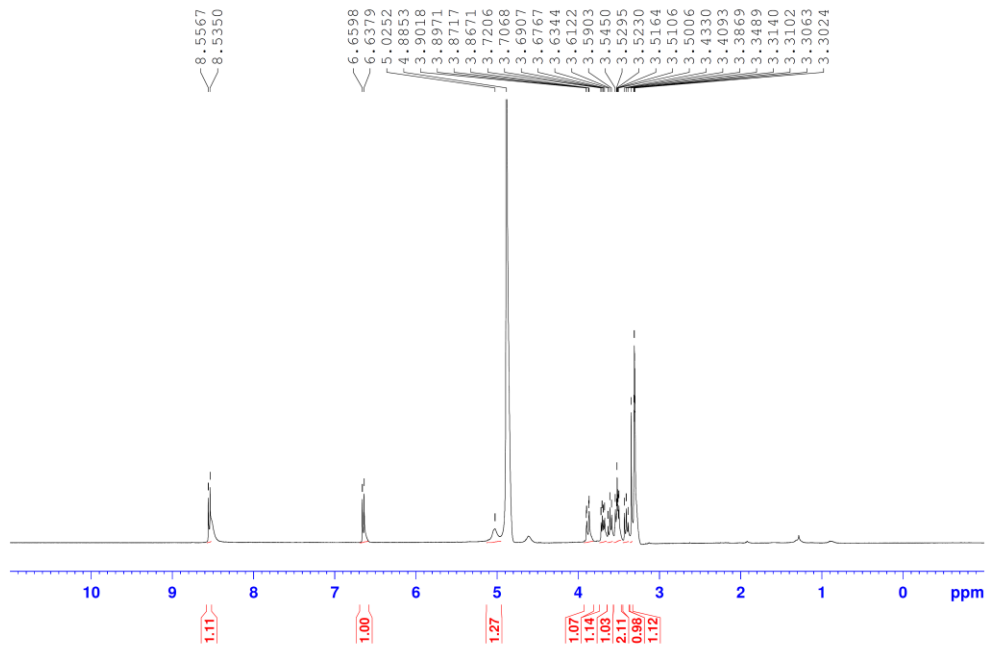

19 <sup>13</sup>C-NMR Spectrum

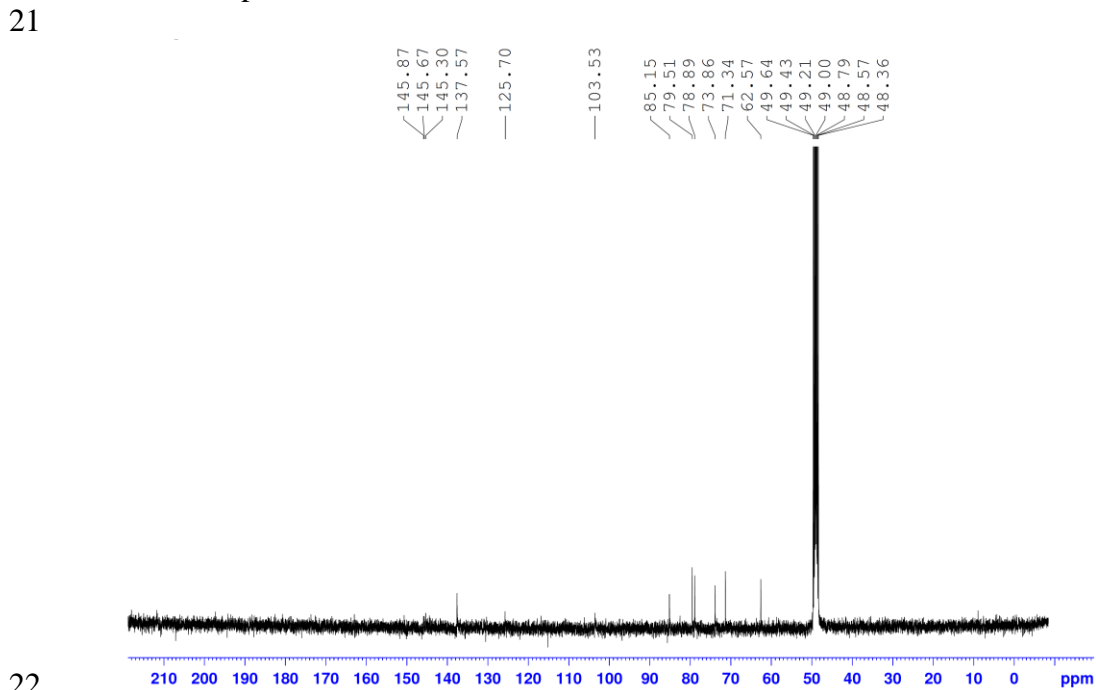

22 **Supplementary Figure 1** 1-NBDG synthesis (A) and NMR spectra (B).

23

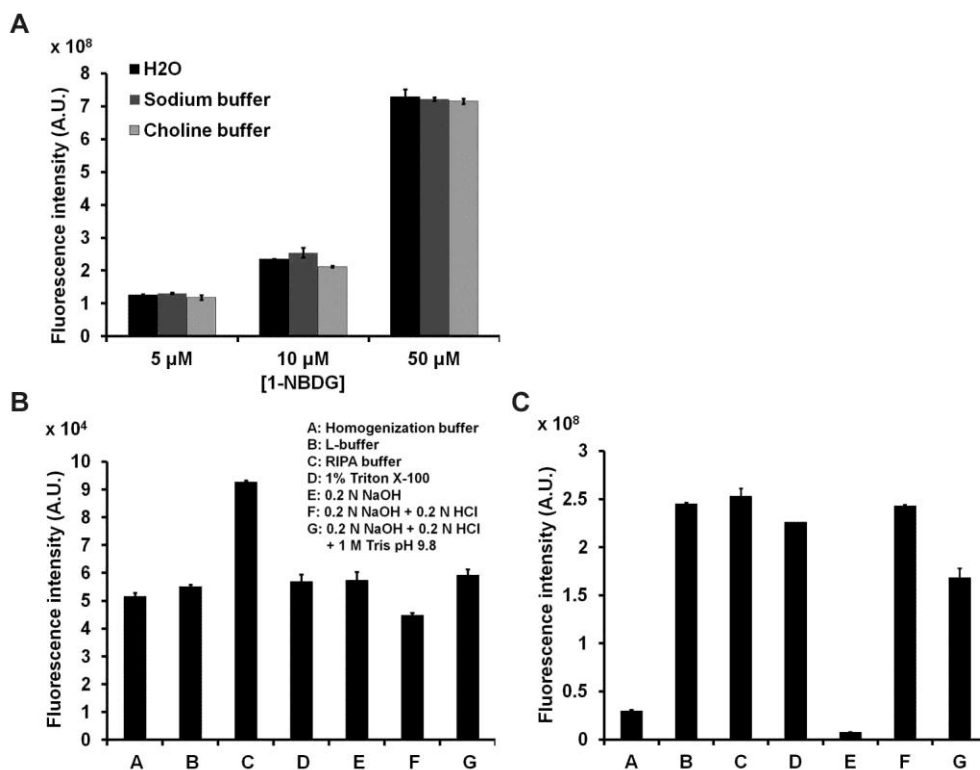

25

26 **Supplementary Figure 2** Optimization of uptake buffers and lysis solutions. (A) The effect of uptake  
27 buffers on 1-NBDG fluorescence. 1-NBDG was dissolved in deionized water, sodium buffer or  
28 choline buffer. Sodium or choline buffer did not affect 1-NBDG fluorescence. (B) Background  
29 fluorescence of cell lysis solutions. All the solutions tested showed relatively low background  
30 fluorescence. Among them, solution C (RIPA buffer) had the highest and solution F (0.2 N NaOH +  
31 0.2 N HCl) had the lowest background fluorescence. (C) Fluorescence of 1-NBDG at 10 μM in cell  
32 lysis solutions. 1-NBDG fluorescence intensities were relatively high in solutions B, C, D, and F; but  
33 dramatically quenched in solutions A and E. Intermediate fluorescence intensity of 1-NBDG was  
34 detected in solution G. Solution F (0.2 N NaOH + 0.2 N HCl) was selected as the lysis solution for  
35 1-NBDG uptake assay based on low background fluorescence and high 1-NBDG fluorescence.  
36 Solutions A and E were excluded because of a quenching effect. Solutions B, C and D were also  
37 excluded because the presence of detergents may interfere with protein assay. Experiments were  
38 performed in triplicate and data are presented as mean ± S.E. Cell lysis solutions used in (B) and (C):

39 A. homogenization buffer: 7.5 mM Na<sub>2</sub>HPO<sub>4</sub>, 1 mM EDTA, pH 7.4; B. L-buffer: PBS with 0.1%  
40 NP-40 and 0.1% Triton X-100; C. RIPA buffer: 50 mM Tris, pH 8.0, 150 mM NaCl, 0.1% SDS, 0.1%  
41 sodium deoxycholate, 1% NP-40; D. 1% Triton X-100 in deionized water; E. 0.2 N NaOH; F. a  
42 mixture of equal volumes of 0.2 N NaOH and 0.2 N HCl; G. a mixture of equal volumes of 0.2 N  
43 NaOH and 0.2 N HCl, adjusted to alkaline pH with 1/10 volume of 1 M Tris, pH 9.8.  
44

45

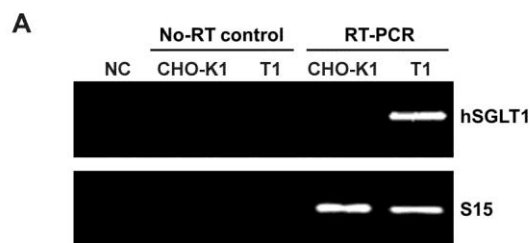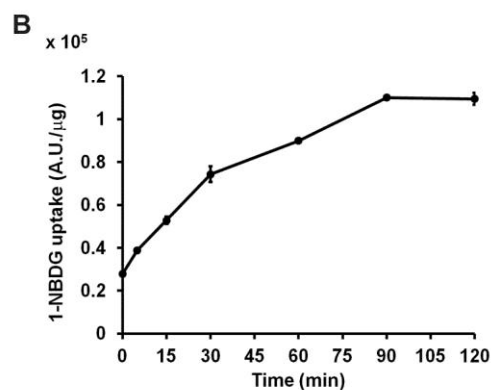

46

47 **Supplementary Figure 3** Expression of hSGLT1 in a CHO-K1 cell clone and the time course of  
48 1-NBDG uptake in this cell clone. (A) Expression of hSGLT1 detected by RT-PCR. CHO-K1: the  
49 parental CHO-K1 cell line. NC: negative control for PCR. S15: a housekeeping gene *rig/S15* used as a  
50 positive control for RT-PCR. (B) Time course of 1-NBDG uptake. 1-NBDG uptake was performed in  
51 sodium buffer. Fluorescence intensity was normalized with protein content ( $\mu\text{g}$ ). Experiments were  
52 performed in triplicate and data are presented as mean  $\pm$  S.E. The results showed that the initial rate  
53 was within 30 min.

54

55 **Supplementary Table 1** IC<sub>50</sub> values of phlorizin for hSGLT1.

| IC <sub>50</sub> (μM) | Reference                               |
|-----------------------|-----------------------------------------|
| 0.11                  | Chang et al., using <sup>14</sup> C-AMG |
| 0.11                  | Chang et al., using 1-NBDG              |
| 0.33                  | Meng et al. (2008)                      |
| 0.17                  | Pajor et al. (2008)                     |
| 0.2                   | Sato et al. (2007)                      |
| 0.21                  | Tahara et al. (2012)                    |

56

57 Summary of published phlorizin IC<sub>50</sub> values for hSGLT1. The IC<sub>50</sub> values acquired from our  
58 non-radioactive cell-based assay system are very close to the published results obtained using  
59 <sup>14</sup>C-AMG.

60

61 **Supplementary Table 2** IC<sub>50</sub> values of the selective SGLT2 inhibitor dapagliflozin for hSGLT2 and  
62 hSGLT1.

| IC <sub>50</sub> (nM) |         | Selectivity | Reference                  |
|-----------------------|---------|-------------|----------------------------|
| hSGLT2                | hSGLT1  |             |                            |
| 1.86                  | 880     | 473         | Chang et al., using 1-NBDG |
| 4                     | 370     | 92.5        | Li et al. (2011)           |
| 6                     | 400-800 | 67-133      | Hummel et al. (2012)       |
| 6.7                   | 885     | 132         | Xu et al. (2009)           |
| 1.1                   | 1390    | 1200        | Meng et al. (2008)         |

63

64 Summary of published IC<sub>50</sub> values of dapagliflozin for hSGLT2 and hSGLT1. The results acquired  
65 from our non-radioactive cell-based system are within the range of the published data obtained using  
66 <sup>14</sup>C-AMG.

67

68 **Supplemental References**

69

70 **C. S. Hummel**, C. Lu, J. Liu, C. Ghezzi, B. A. Hirayama, D. D. Loo, V. Kepe, J. R. Barrio and E. M.

71 Wright, *Am. J. Physiol. Cell Physiol.*, 2012, 302, C373–382.

72 **A. R. Li, J. Zhang**, J. Greenberg, T. Lee and J. Liu, *Bioorg. Med. Chem. Lett.*, 2011, **21**, 2472–2475.

73 **W. Meng**, B. A. Ellsworth, A. A. Nirschl, P. J. McCann, M. Patel, R. N. Girotra, G. Wu, P. M. Sher,

74 E. P. Morrison, S. A. Biller, R. Zahler, P. P. Deshpande, A. Pullockaran, D. L. Hagan, N. Morgan, J.

75 R. Taylor, M. T. Obermeier, W. G. Humphreys, A. Khanna, L. Discenza, J. G. Robertson, A. Wang, S.

76 Han, J. R. Wetterau, E. B. Janovitz, O. P. Flint, J. M. Whaley and W. N. Washburn. *J. Med. Chem.*,

77 2008, **51**, 1145–1149.

78 **A. M. Pajor**, K. M. Randolph, S. A. Kerner and C. D. Smith, *J. Pharmacol. Exp. Ther.*, 2008, **324**,

79 985–991.

80 **S. Sato**, J. Takeo, C. Aoyama, and H. Kawahara, *Bioorg. Med. Chem.*, 2007, **15**, 3445–3449.

81 **A. Tahara**, E. Kurosaki, M. Yokono, D. Yamajuku, R. Kihara, Y. Hayashizaki, T. Takasu, M.

82 Imamura, L. Qun, H. Tomiyama, Y. Kobayashi, A. Noda, M. Sasamata and M. Shibasaki, *Naunyn*

83 *Schmiedebergs Arch. Pharmacol.*, 2012, **385**, 423–436.

84 **B. Xu**, B. Lv, Y. Feng, G. Xub, J. Du, A. Welihinda, Z. Sheng, B. Seed and Y. Chen, *Bioorg. Med.*

85 *Chem. Lett.*, 2009, **19**, 5632–5635.
